# Supplementary material for: A multi-level investigation of the genetic relationship between endometriosis and ovarian cancer histotypes
Source: PubMed Central journal article supplement — Cell Rep Med. 2022 Mar 15;3(3):100542. doi: 10.1016/j.xcrm.2022.100542 (PMC9040176; doi:10.1016/j.xcrm.2022.100542), 2022-03-15
Supplement: mmc1.pdf [file mmc1.pdf]

**Cell Reports Medicine, Volume 3**

**Supplemental information**

**A multi-level investigation of the genetic  
relationship between endometriosis  
and ovarian cancer histotypes**

**Sally Mortlock, Rosario I. Corona, Pik Fang Kho, Paul Pharoah, Ji-Heui Seo, Matthew L. Freedman, Simon A. Gayther, Matthew T. Siedhoff, Peter A.W. Rogers, Ronald Leuchter, Christine S. Walsh, Ilana Cass, Beth Y. Karlan, B.J. Rimel, Ovarian Cancer Association Consortium, International Endometriosis Genetics Consortium, Grant W. Montgomery, Kate Lawrenson, and Siddhartha P. Kar**

## Supplementary Figures

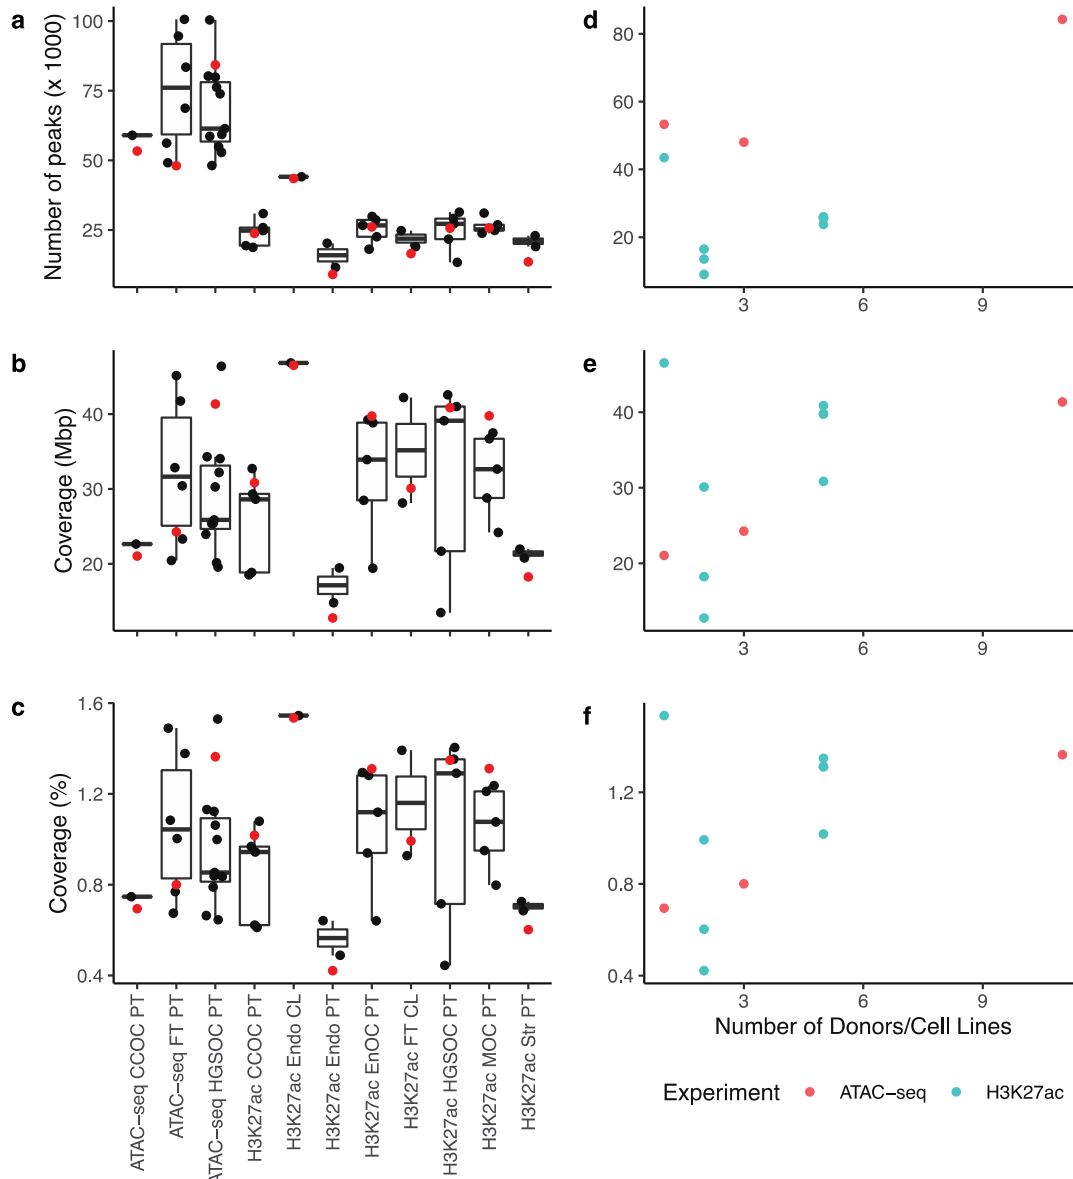

**Figure S1. ATAC-seq and H3K27ac CHIP-seq coverage and peaks.** (a) Number of peaks and (b) genome coverage in Mbp and (c) genome coverage in percentage for sample peak sets (black dots) and consensus peak sets (red dots). (d) Number of peaks (e) and genome coverage in Mbp and (g) genome coverage in percentage for consensus peak sets as a function of the number of donors. Endo, endometriosis; FT, fallopian tube; Str, endometriosis-associated stroma; CCOC, clear cell ovarian cancer; EnOC, endometrioid ovarian cancer; HGSOC, high-grade serous ovarian cancer; MOC, mucinous ovarian cancer. Data for both primary tissues (PT) and cell lines (CL) is shown. Related to STAR Methods and Table S5.

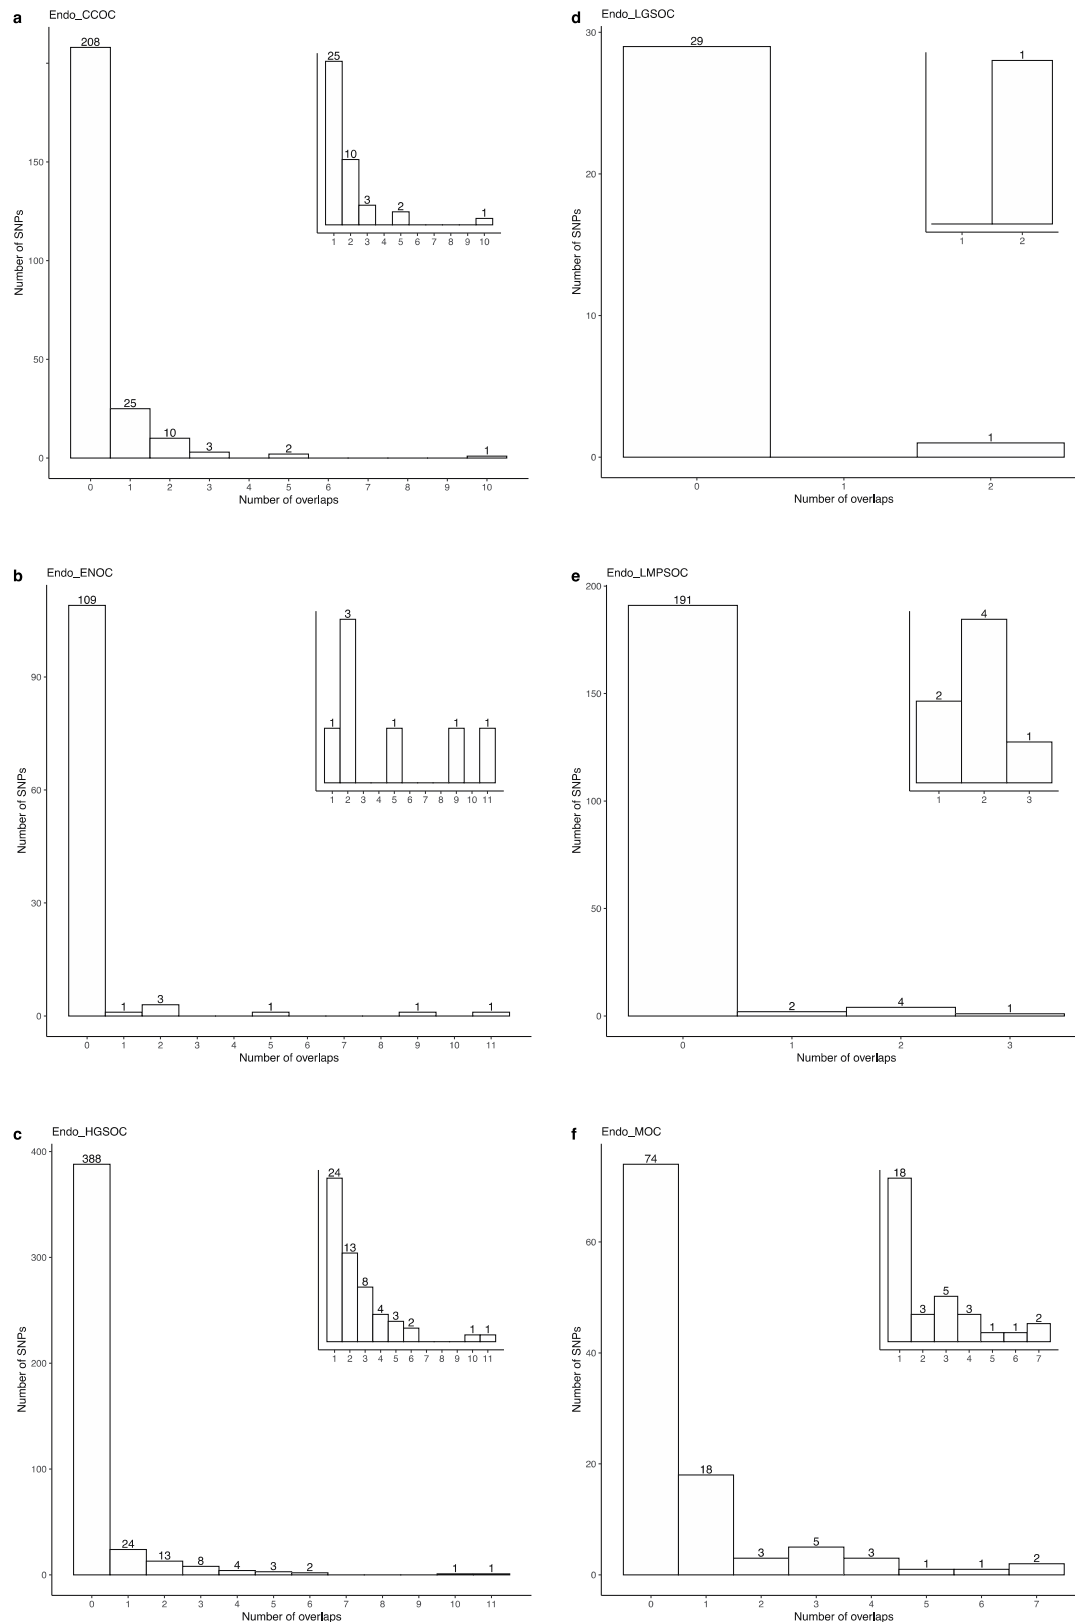

**Figure S2. Associated SNPs overlap biofeatures.** Histogram of number of SNPs associated with endometriosis and (a) clear cell ovarian cancer (CCOC), (b) endometrioid ovarian cancer (ENOC), (c) high-grade serous ovarian cancer (HGSOC), (d) Low-grade serous ovarian cancer (LGSOC), (e) low malignant potential serous ovarian cancer (LMPSOC) and (f) mucinous ovarian cancer (MOC), that overlap  $n$  biofeatures. Inset histograms show the number of overlaps  $\geq 1$ . Related to Figure 1 and Table S7.

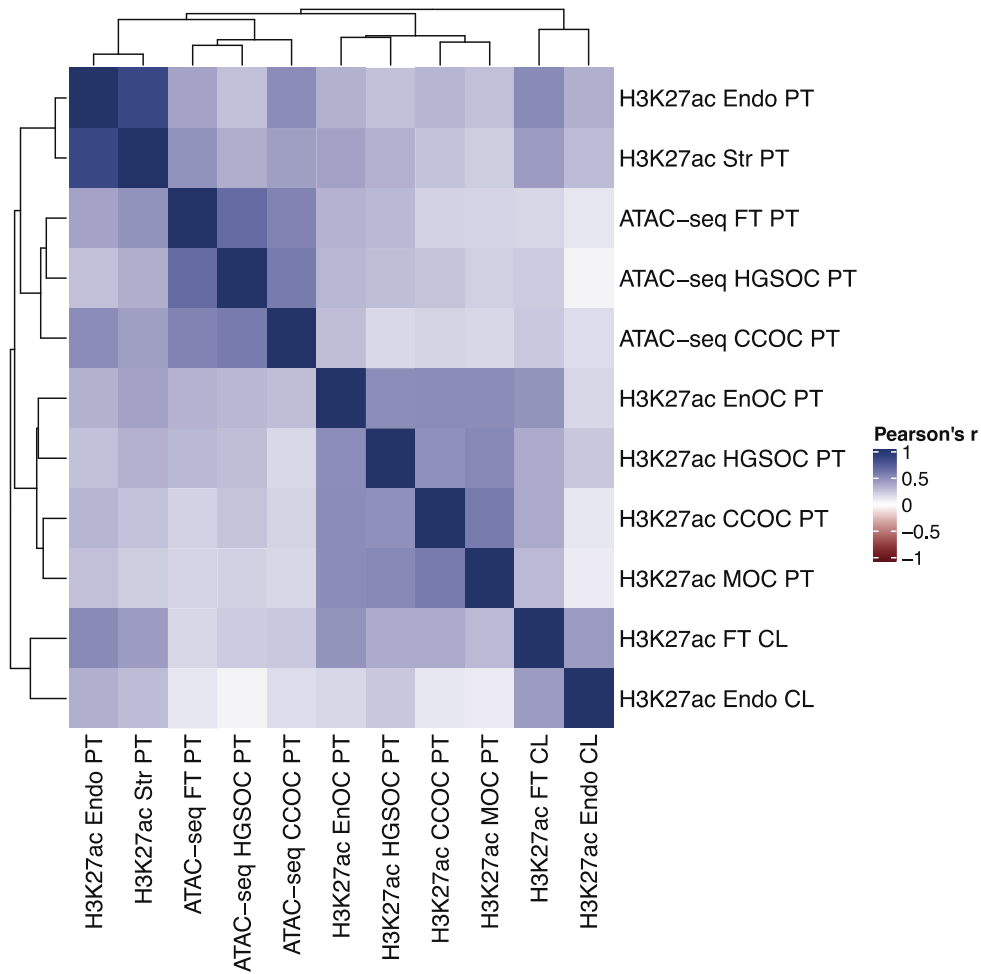

**Figure S3. Correlation between biofeature overlap.** Pearson's correlation coefficient between ATAC-seq and H3K27ac ChIP-seq biofeatures based on the overlap with SNPs associated with both endometriosis and ovarian cancer risk. Endo, endometriosis; FT, fallopian tube; Str, endometriosis-associated stroma; CCOC, clear cell ovarian cancer; EnOC, endometrioid ovarian cancer; HGSOC, high-grade serous ovarian cancer; MOC, mucinous ovarian cancer. Data for both primary tissues (PT) and cell lines (CL) is shown. Related to Figure 1 and Table S5.

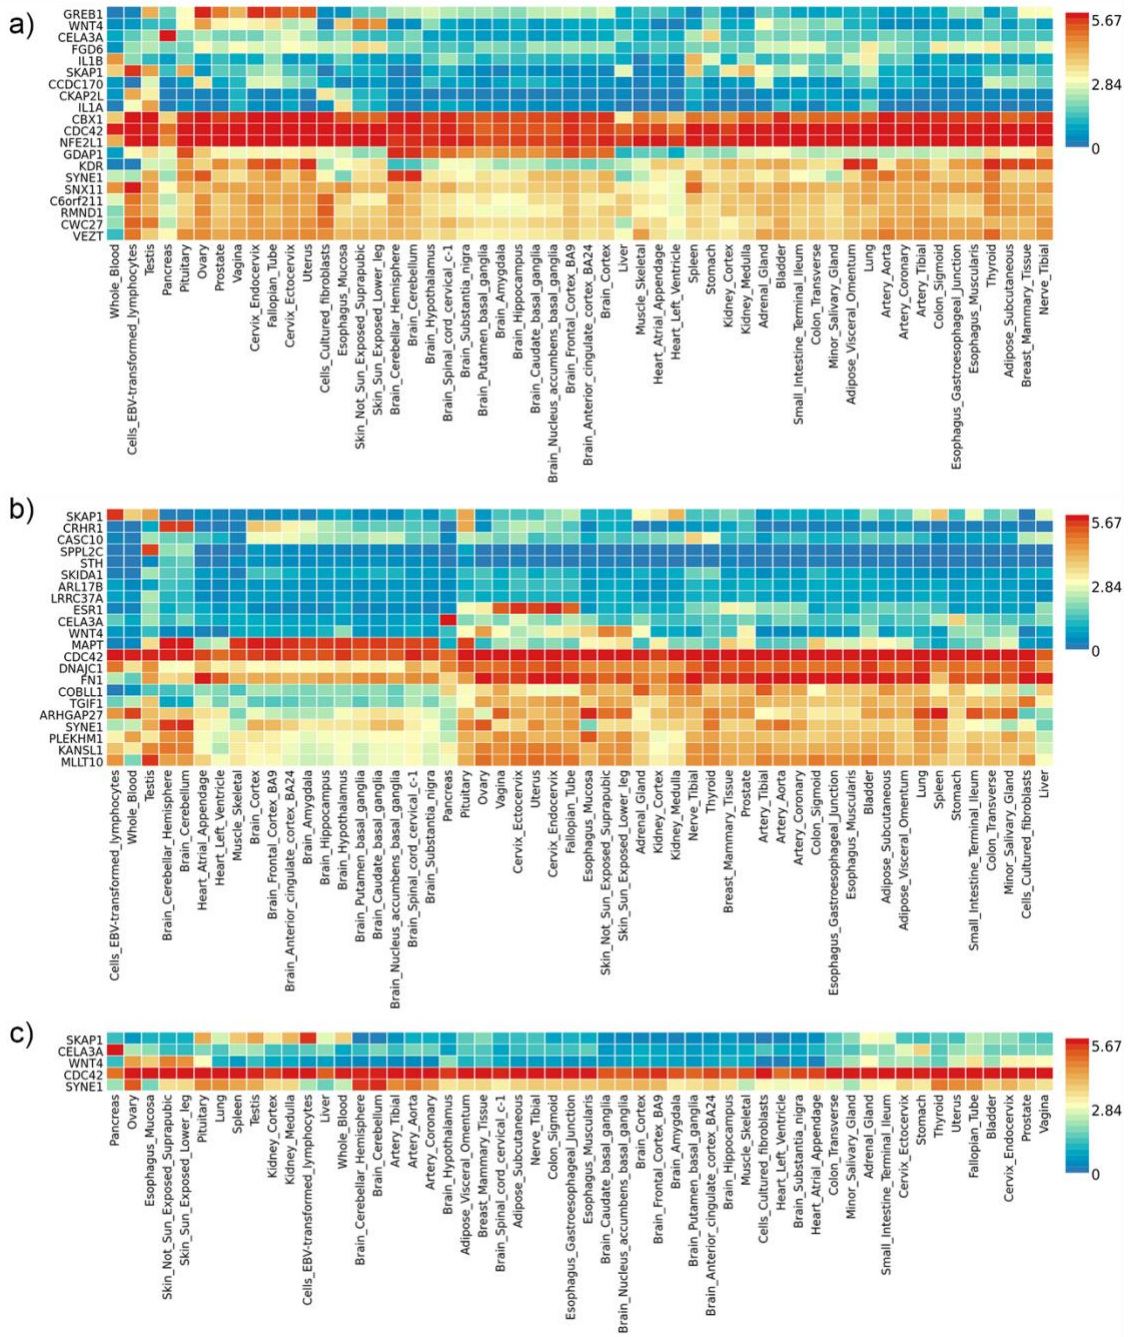

**Figure S4. Expression of genes annotated to associated regions.** Heatmap, generated in FUMA, of genes annotated to SNPs significantly associated with endometriosis plus (a) clear cell ovarian cancer, (b) high-grade serous ovarian cancer and (c) all three, expressed across 58 tissues from GTEx. Related to Tables 3 and 4 and Table S8.

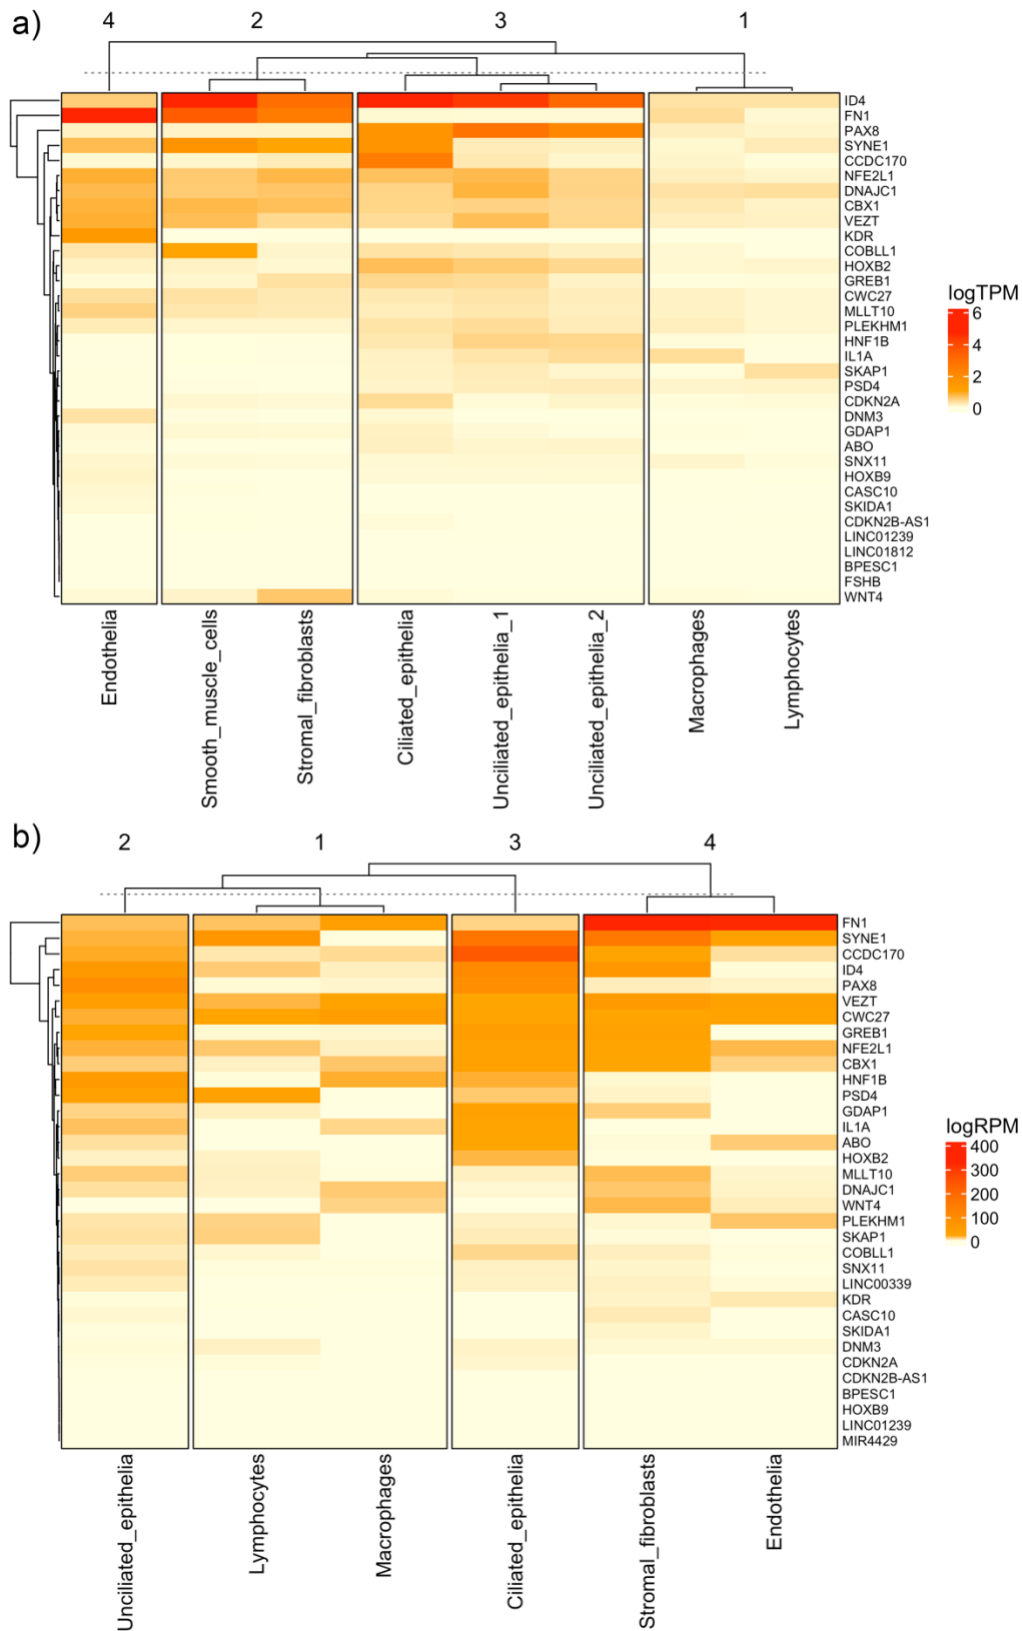

**Figure S5. Endometrial single-cell expression of target genes.** Heatmaps showing the expression of target genes in eight cell types identified from single-cell sequencing of endometrial samples by Wang et al. 2020 [GSE111976]. Counts from both the 10x dataset (a), generated using the 10x Chromium system, and C1 dataset (b), generated using Fluidigm C1 medium chips, were plotted. Related to Tables 4 and 6.

## Supplementary Tables

**Table S1. Mendelian Randomization results for the association between genetic liability to each epithelial ovarian cancer (EOC) histotype and endometriosis risk.** Related to Table 2. The primary IVW analysis results are in bold font.

| Exposure                                                                                                                                                                                                                                                                                                                                                                                                                          | Method                           | nsnp      | pval        | OR          | OR_lci95    | OR_uci95    |
|-----------------------------------------------------------------------------------------------------------------------------------------------------------------------------------------------------------------------------------------------------------------------------------------------------------------------------------------------------------------------------------------------------------------------------------|----------------------------------|-----------|-------------|-------------|-------------|-------------|
| <b>Using genetic variants associated with each EOC histotype at P &lt; 5e-8</b>                                                                                                                                                                                                                                                                                                                                                   |                                  |           |             |             |             |             |
| <b>High-grade Serous</b>                                                                                                                                                                                                                                                                                                                                                                                                          | <b>Inverse variance weighted</b> | <b>14</b> | <b>0.59</b> | <b>1.03</b> | <b>0.93</b> | <b>1.14</b> |
| High-grade Serous                                                                                                                                                                                                                                                                                                                                                                                                                 | MR Egger                         | 14        | 0.64        | 0.95        | 0.75        | 1.19        |
| High-grade Serous                                                                                                                                                                                                                                                                                                                                                                                                                 | Weighted median                  | 14        | 0.95        | 1.00        | 0.92        | 1.08        |
| <b>Low Malignant Potential Serous</b>                                                                                                                                                                                                                                                                                                                                                                                             | <b>Inverse variance weighted</b> | <b>3</b>  | <b>0.31</b> | <b>1.04</b> | <b>0.97</b> | <b>1.11</b> |
| Low Malignant Potential Serous                                                                                                                                                                                                                                                                                                                                                                                                    | MR Egger                         | 3         | 0.95        | 1.01        | 0.78        | 1.31        |
| Low Malignant Potential Serous                                                                                                                                                                                                                                                                                                                                                                                                    | Weighted median                  | 3         | 0.52        | 1.03        | 0.95        | 1.11        |
| <b>Mucinous</b>                                                                                                                                                                                                                                                                                                                                                                                                                   | <b>Inverse variance weighted</b> | <b>4</b>  | <b>0.06</b> | <b>1.09</b> | <b>1.00</b> | <b>1.20</b> |
| Mucinous                                                                                                                                                                                                                                                                                                                                                                                                                          | MR Egger                         | 4         | 0.14        | 7.35        | 1.37        | 39.31       |
| Mucinous                                                                                                                                                                                                                                                                                                                                                                                                                          | Weighted median                  | 4         | 0.01        | 1.12        | 1.03        | 1.21        |
| <b>Using genetic variants associated with each EOC histotype at P &lt; 1e-5 (because no variants were associated with endometrioid and Low-grade serous EOC risks at P &lt; 5e-8 and only one variant was associated with clear cell EOC risk at P &lt; 5e-8 in our data set, precluding the use of IVW, weighted median and MR-Egger methods, all of which require at least three variants in the genetic instrument for MR)</b> |                                  |           |             |             |             |             |
| <b>Clear Cell</b>                                                                                                                                                                                                                                                                                                                                                                                                                 | <b>Inverse variance weighted</b> | <b>21</b> | <b>0.41</b> | <b>1.01</b> | <b>0.98</b> | <b>1.05</b> |
| Clear Cell                                                                                                                                                                                                                                                                                                                                                                                                                        | MR Egger                         | 21        | 0.16        | 1.06        | 0.98        | 1.14        |
| Clear Cell                                                                                                                                                                                                                                                                                                                                                                                                                        | Weighted median                  | 21        | 0.14        | 1.03        | 0.99        | 1.08        |
| <b>Endometrioid</b>                                                                                                                                                                                                                                                                                                                                                                                                               | <b>Inverse variance weighted</b> | <b>11</b> | <b>0.17</b> | <b>0.95</b> | <b>0.88</b> | <b>1.02</b> |
| Endometrioid                                                                                                                                                                                                                                                                                                                                                                                                                      | MR Egger                         | 11        | 0.75        | 1.04        | 0.82        | 1.32        |
| Endometrioid                                                                                                                                                                                                                                                                                                                                                                                                                      | Weighted median                  | 11        | 0.75        | 0.98        | 0.89        | 1.08        |
| <b>Low-grade Serous</b>                                                                                                                                                                                                                                                                                                                                                                                                           | <b>Inverse variance weighted</b> | <b>26</b> | <b>0.68</b> | <b>0.99</b> | <b>0.97</b> | <b>1.02</b> |
| Low-grade Serous                                                                                                                                                                                                                                                                                                                                                                                                                  | MR Egger                         | 26        | 0.39        | 0.98        | 0.92        | 1.03        |
| Low-grade Serous                                                                                                                                                                                                                                                                                                                                                                                                                  | Weighted median                  | 26        | 0.72        | 0.99        | 0.96        | 1.03        |
| nsnp: number of SNPs included as instruments<br>pval: Mendelian Randomisation P-value<br>OR: odds ratio<br>OR_lci95: lower 95% confidence interval odds ratio<br>OR_uci95: upper 95% confidence interval odds ratio                                                                                                                                                                                                               |                                  |           |             |             |             |             |

**Table S7. Index SNPs for independent loci from the cross-trait meta-analysis containing SNPs intersecting with biofeatures.** Related to Figure 1 and Figure S2.

| Comparison                        | rsID       | Chr   | Position (bp) | Nearest gene or gene with functional evidence | nOverlap = 0 | nOverlap > 0 | nOverlap > 0 (%) | Total SNPs |
|-----------------------------------|------------|-------|---------------|-----------------------------------------------|--------------|--------------|------------------|------------|
| High-grade Serous + Endometriosis | rs7217120  | chr17 | 46484755      | <i>SKAPI</i>                                  | 220          | 26           | 10.57            | 246        |
| Mucinous + Endometriosis          | rs4849174  | chr2  | 113973467     | <i>PAX8</i>                                   | 42           | 26           | 38.24            | 68         |
| Clear Cell + Endometriosis        | rs10167914 | chr2  | 113563361     | <i>ILIA</i>                                   | 18           | 12           | 40.00            | 30         |
| Clear Cell + Endometriosis        | rs11674184 | chr2  | 11721535      | <i>GREB1</i>                                  | 50           | 12           | 19.35            | 62         |
| High-grade Serous + Endometriosis | rs12037376 | chr1  | 22462111      | <i>LINC00339</i>                              | 36           | 9            | 20.00            | 45         |
| High-grade Serous + Endometriosis | rs7084454  | chr10 | 21821274      | <i>MLLT10</i>                                 | 85           | 7            | 7.61             | 92         |
| High-grade Serous + Endometriosis | rs11658063 | chr17 | 36103872      | <i>HNF1B</i>                                  | 6            | 6            | 50.00            | 12         |
| Mucinous + Endometriosis          | rs11674184 | chr2  | 11721535      | <i>GREB1</i>                                  | 23           | 5            | 17.86            | 28         |
| Clear Cell + Endometriosis        | rs11651755 | chr17 | 36099840      | <i>HNF1B</i>                                  | 2            | 4            | 66.67            | 6          |
| Clear Cell + Endometriosis        | rs12700667 | chr7  | 25901639      | <i>AK057379</i>                               | 9            | 4            | 30.77            | 13         |
| Endometrioid + Endometriosis      | rs10445377 | chr17 | 46214168      | <i>SKAPI</i>                                  | 60           | 4            | 6.25             | 64         |
| High-grade Serous + Endometriosis | rs7570979  | chr2  | 11717429      | <i>GREB1</i>                                  | 17           | 4            | 19.05            | 21         |
| LMP Serous + Endometriosis        | rs10445377 | chr17 | 46214168      | <i>SKAPI</i>                                  | 61           | 4            | 6.15             | 65         |
| Clear Cell + Endometriosis        | rs61768001 | chr1  | 22465820      | <i>LINC00339</i>                              | 20           | 3            | 13.04            | 23         |
| LMP Serous + Endometriosis        | rs35713035 | chr17 | 46501710      | <i>SKAPI</i>                                  | 119          | 3            | 2.46             | 122        |
| Clear Cell + Endometriosis        | rs4516787  | chr4  | 56010165      | <i>KDR</i>                                    | 74           | 2            | 2.63             | 76         |
| Endometrioid + Endometriosis      | rs11031005 | chr11 | 30226356      | <i>FSHB</i>                                   | 27           | 2            | 6.90             | 29         |
| Mucinous + Endometriosis          | rs10167914 | chr2  | 113563361     | <i>ILIA</i>                                   | 4            | 2            | 33.33            | 6          |
| Clear Cell + Endometriosis        | rs1971256  | chr6  | 151816011     | <i>CCDC170</i>                                | 0            | 1            | 100.00           | 1          |
| Clear Cell + Endometriosis        | rs1311245  | chr5  | 64272107      | <i>CWC27</i>                                  | 1            | 1            | 50.00            | 2          |
| Clear Cell + Endometriosis        | rs7309252  | chr12 | 95687497      | <i>VEZT</i>                                   | 6            | 1            | 14.29            | 7          |
| Clear Cell + Endometriosis        | rs8069263  | chr17 | 46286778      | <i>SKAPI</i>                                  | 8            | 1            | 11.11            | 9          |
| Endometrioid + Endometriosis      | rs1971256  | chr6  | 151816011     | <i>CCDC170</i>                                | 5            | 1            | 16.67            | 6          |
| High-grade Serous + Endometriosis | rs1250244  | chr2  | 216297796     | <i>FNI</i>                                    | 0            | 1            | 100.00           | 1          |
| High-grade Serous + Endometriosis | rs10048393 | chr18 | 3476253       | <i>AX721193</i>                               | 2            | 1            | 33.33            | 3          |



|                                   |             |       |           |                     |    |   |       |    |
|-----------------------------------|-------------|-------|-----------|---------------------|----|---|-------|----|
| High-grade Serous + Endometriosis | rs111610638 | chr6  | 152449994 | <i>SYNE1</i>        | 4  | 1 | 20.00 | 5  |
| High-grade Serous + Endometriosis | rs635634    | chr9  | 136155000 | <i>ABO</i>          | 9  | 1 | 10.00 | 10 |
| Low-grade Serous + Endometriosis  | rs10445377  | chr17 | 46214168  | <i>SKAP1</i>        | 27 | 1 | 3.57  | 28 |
| Clear Cell + Endometriosis        | rs17803970  | chr6  | 152553718 | <i>SYNE1</i>        | 9  | 0 | 0.00  | 9  |
| Clear Cell + Endometriosis        | rs71575922  | chr6  | 152554014 | <i>SYNE1</i>        | 6  | 0 | 0.00  | 6  |
| Clear Cell + Endometriosis        | rs566679    | chr9  | 22634893  | <i>LINC01239</i>    | 3  | 0 | 0.00  | 3  |
| Clear Cell + Endometriosis        | rs78103255  | chr8  | 75311331  | <i>GDAP1</i>        | 2  | 0 | 0.00  | 2  |
| Endometrioid + Endometriosis      | rs56318008  | chr1  | 22470407  | <i>LINC00339</i>    | 10 | 0 | 0.00  | 10 |
| Endometrioid + Endometriosis      | rs6475610   | chr9  | 22141894  | <i>CDKN2B-AS1</i>   | 5  | 0 | 0.00  | 5  |
| Endometrioid + Endometriosis      | rs495590    | chr1  | 172122809 | <i>DNM3</i>         | 2  | 0 | 0.00  | 2  |
| High-grade Serous + Endometriosis | rs6908034   | chr6  | 19773930  | <i>ID4</i>          | 3  | 0 | 0.00  | 3  |
| High-grade Serous + Endometriosis | rs62065444  | chr17 | 43565599  | <i>PLEKHM1</i>      | 3  | 0 | 0.00  | 3  |
| High-grade Serous + Endometriosis | rs1981046   | chr9  | 22173407  | <i>CDKN2B-AS1</i>   | 2  | 0 | 0.00  | 2  |
| High-grade Serous + Endometriosis | rs13000026  | chr2  | 165558884 | <i>COBLL1</i>       | 1  | 0 | 0.00  | 1  |
| LMP Serous + Endometriosis        | rs4654785   | chr1  | 22491843  | <i>LOC105376850</i> | 5  | 0 | 0.00  | 5  |
| LMP Serous + Endometriosis        | rs10748858  | chr10 | 105639514 | <i>OBFC1</i>        | 4  | 0 | 0.00  | 4  |
| LMP Serous + Endometriosis        | rs11031005  | chr11 | 30226356  | <i>FSHB</i>         | 2  | 0 | 0.00  | 2  |
| Low-grade Serous + Endometriosis  | rs77294520  | chr2  | 11660955  | <i>GREB1</i>        | 1  | 0 | 0.00  | 1  |
| Low-grade Serous + Endometriosis  | rs584336    | chr6  | 152616173 | <i>SYNE1</i>        | 1  | 0 | 0.00  | 1  |
| Mucinous + Endometriosis          | rs6546324   | chr2  | 67856490  | <i>LINC01812</i>    | 3  | 0 | 0.00  | 3  |
| Mucinous + Endometriosis          | rs67808862  | chr3  | 138849543 | <i>BPESC1</i>       | 2  | 0 | 0.00  | 2  |

nOverlap: number of SNPs in locus intersecting biofeature.
